# Supplementary material for: Effects of thiourea on the skull of Triturus newts during ontogeny
Source: PeerJ. 2021 Jun 2;9:e11535. doi: 10.7717/peerj.11535 (PMC8179219; doi:10.7717/peerj.11535)
Supplement: Supplemental Information 4 — Ossification scores used to quantify level of ossification in cranial bones. [file peerj-09-11535-s004.xlsx]

## Sheet: stage 62-raw data
specimens ID	concentration	premaxilla	frontale	parietale	squamosal	exoccipitale	vomer	palatoptery	parasphenoid
k_62_1_2	control	2	2	1	2	2	2	2	1
k_62_3_2	control	2	2	2	2	2	2	2	2
k62_4_3	control	2	2	2	1	2	2	2	2
k62_5_3	control	2	2	2	2	2	2	2	2
k62_6_3	control	2	2	2	2	2	2	1	2
k62_7_2	control	2	2	2	1	2	2	1	1
k62_8_2	control	2	2	2	2	2	2	2	2
k62_8_3	control	2	2	2	1	2	2	2	2
k62_9_1	control	2	1	1	2	2	2	2	2
k62_9_2	control	2	2	2	2	2	2	2	2
Tu62_1_2	thiourea 0.05	2	1	2	1	2	2	1	2
Tu62_1_3	thiourea 0.05	2	2	2	1	2	2	1	1
Tu62_2_3	thiourea 0.05	2	2	2	2	2	2	2	2
Tu62_3_3	thiourea 0.1	2	2	2	2	2	2	2	2
Tu62_4_3	thiourea 0.1	2	1	1	1	2	2	1	2
Tu62_5_2	thiourea 0.05	2	2	2	2	2	2	1	1
Tu62_5_3	thiourea 0.05	2	2	2	2	2	2	2	2
Tu62_6_2	thiourea 0.1	2	2	2	2	2	2	1	2
Tu62_6_3	thiourea 0.1	2	2	2	2	2	2	2	2
Tu62_6_4	thiourea 0.1	2	2	2	2	2	2	1	1
Tu62_7_2	thiourea 0.05	2	2	2	2	2	2	1	2
Tu62_7_3	thiourea 0.05	2	2	2	2	1	2	2	1
Tu62_8_3	thiourea 0.1	2	2	2	2	2	2	2	2
Tu62_9_1	thiourea 0.05	2	1	1	1	2	2	1	1
Tu62_9_2	thiourea 0.05	2	2	2	1	1	2	1	1
Tu62_9_3	thiourea 0.05	2	2	2	2	2	2	2	1

## Sheet: metamorphic stage-raw data
specimens ID	concentartion	nasal	frontal	prefrontal	maxilla	parietal	squamosal	vomer	palatopterygoid	pterygoid
k13_MM_3	control	2	2	2	2	2	2	2	0	2
k14_MM_2	control	2	2	2	2	2	2	2	0	2
K14_MM_3	control	2	2	2	2	2	2	2	0	2
K15_MM_1	control	2	2	2	2	2	2	2	0	2
K15_MM_2	control	2	2	2	2	2	2	2	0	2
K16_MM_1	control	2	2	2	2	2	2	2	0	2
K16_MM_2	control	2	2	2	2	2	2	2	0	2
K16_MM_3	control	2	2	2	2	2	2	2	0	2
K18_MM_1	control	2	2	2	2	2	2	2	0	2
K19_MM_1	control	2	2	2	2	2	2	2	0	2
K19_MM_2	control	2	2	2	2	2	2	2	0	2
K24_MM_1	control	2	2	2	2	2	2	2	0	2
K24_MM_2	control	2	2	2	2	2	2	2	0	2
K24_MM_3	control	2	2	2	2	2	2	2	0	2
Tu23_0.1_1	thiourea 0.1	1	2	1	1	2	2	1	2	0
Tu23_0.1_2	thiourea 0.1	0	2	1	1	2	2	1	2	0
Tu23_0.1_3	thiourea 0.1	0	2	1	1	2	2	1	2	0
Tu25_0.1_1	thiourea 0.1	0	2	0	1	2	2	1	2	0
Tu25_0.1_2	thiourea 0.1	0	2	1	1	2	2	1	2	0
Tu29_0.1_1	thiourea 0.1	0	2	0	1	2	2	1	2	0
Tu29_0.1_2	thiourea 0.1	0	2	1	1	2	2	1	2	0
Tu29_0.1_3	thiourea 0.1	0	2	0	1	2	2	1	2	0
Tu31_0.1_1	thiourea 0.1	1	2	1	1	2	2	1	2	0
Tu31_0.1_2	thiourea 0.1	1	2	1	1	2	2	1	2	0
Tu33_0.1_2	thiourea 0.1	0	2	1	1	2	2	1	2	0
Tu37_0.1_1	thiourea 0.1	1	2	1	1	2	2	1	2	0
Tu37_0.1_2	thiourea 0.1	1	2	1	1	2	2	1	2	0
Tu37_0.1_3	thiourea 0.1	1	2	1	1	2	2	1	2	0
Tu41_0.1_1	thiourea 0.1	0	2	0	1	2	2	1	2	0
Tu41_0.1_2	thiourea 0.1	1	2	1	1	2	2	1	2	0
Tu22_0.05_1	thiourea 0.05	1	2	1	1	2	2	1	2	0
Tu24_0.05_1	thiourea 0.05	0	2	0	1	2	2	1	2	0
Tu24_0.05_2	thiourea 0.05	0	2	0	1	2	2	1	2	0
Tu24_0.05_3	thiourea 0.05	0	2	0	1	2	2	1	2	0
Tu28_0.05_1	thiourea 0.05	1	2	1	1	2	2	1	2	0
Tu28_0.05_2	thiourea 0.05	1	2	1	1	2	2	1	2	0
Tu30_0.05_1	thiourea 0.05	0	2	1	1	2	2	1	2	0
Tu30_0.05_2	thiourea 0.05	2	2	2	2	2	2	1	2	0
Tu30_0.05_3	thiourea 0.05	1	2	1	1	2	2	1	2	0
Tu32_0.05_1	thiourea 0.05	0	2	0	1	2	2	1	2	0
Tu34_0.05_1	thiourea 0.05	1	2	1	1	2	2	1	2	0
Tu34_0.05_2	thiourea 0.05	1	2	1	1	2	2	1	2	0
Tu34_0.05_3	thiourea 0.05	1	2	1	1	2	2	1	2	0
Tu36_0.05_1	thiourea 0.05	0	2	1	1	2	2	1	2	0
Tu36_0.05_2	thiourea 0.05	1	2	1	1	2	2	1	2	0
Tu38_0.05_1	thiourea 0.05	1	2	1	1	2	2	1	2	0
Tu38_0.05_2	thiourea 0.05	1	2	1	1	2	2	1	2	0
Tu38_0.05_3	thiourea 0.05	0	2	1	1	2	2	1	2	0
Tu40_0.05_2	thiourea 0.05	1	2	1	1	2	2	1	2	0
